# Supplementary material for: BDNF Induced Translation of Limk1 in Developing Neurons Regulates Dendrite Growth by Fine-Tuning Cofilin1 Activity
Source: PubMed Central journal article supplement (PMC6436473; doi:10.3389/fnmol.2019.00064), 2019-03-20
Supplement: Image_1.pdf [file Image_1.pdf]

# BDNF Induced Translation of Limk1 in Developing Neurons Regulates Dendrite Growth by Fine-tuning Cofilin1 Activity.

## Supplementary Figure 1

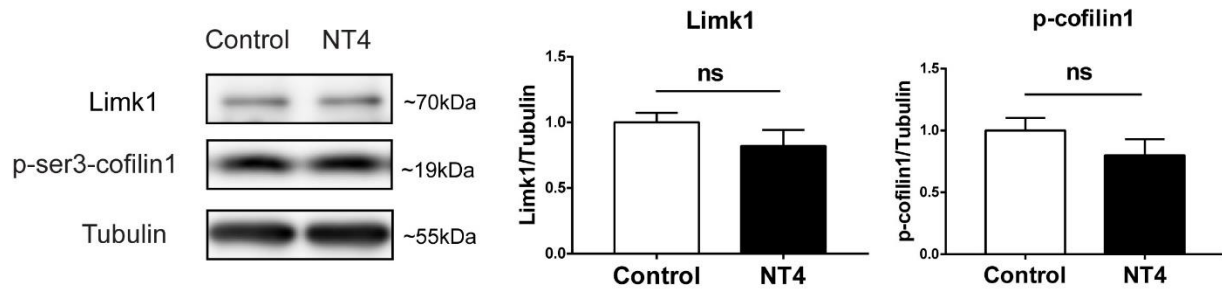

## Supplementary Figure 2

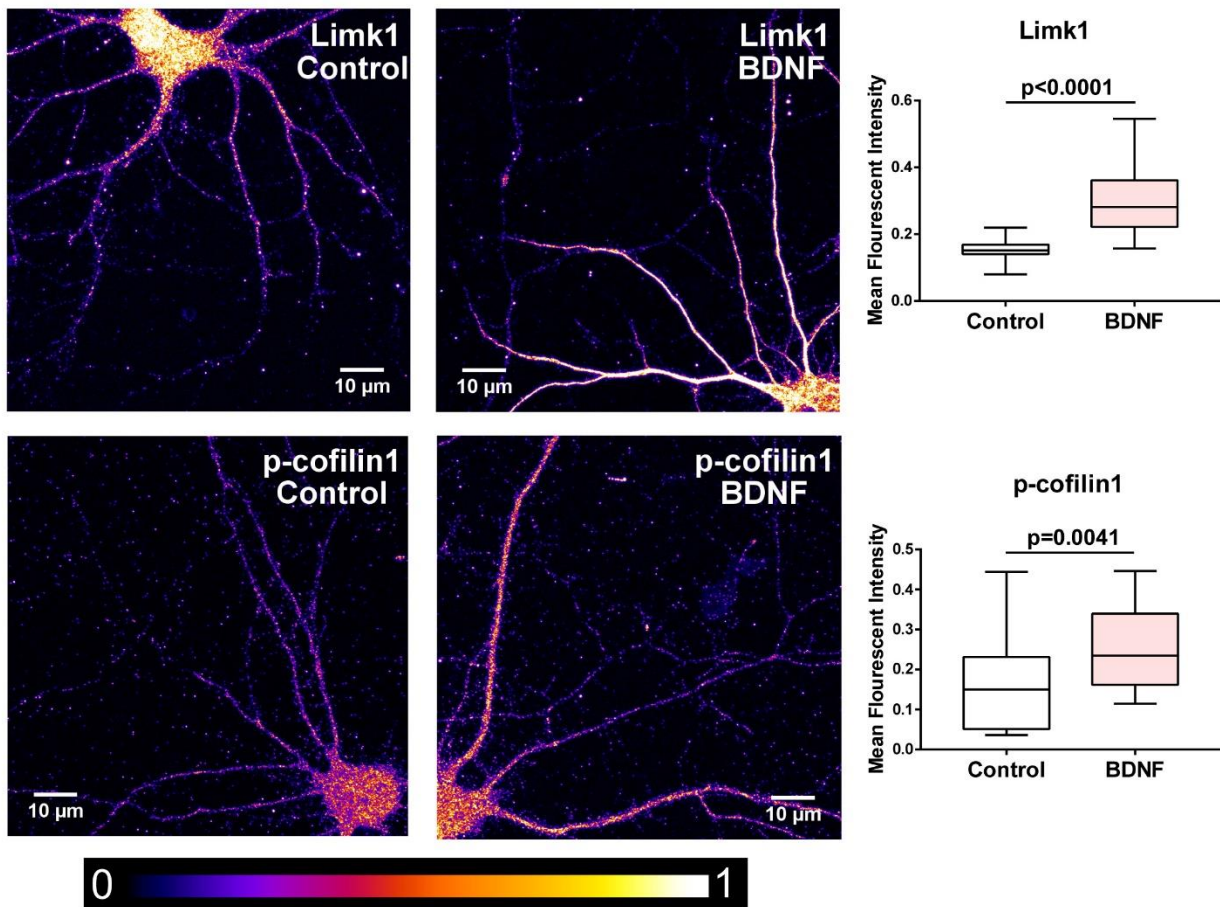

## Supplementary Figure 1

### **NT4 treatment did not affect Limk1 levels or phosphorylation of cofilin1**

- A. Representative immunoblots (Left) and quantification for Limk1 (Center) and p-cofilin1 (Right) from DIV 5 cortical neurons treated with 50ng/ml NT4 for 1 hour (n=5, Unpaired Student's t-test, mean  $\pm$  s.e.m). ns-Not significant

## Supplementary Figure 2

### **BDNF leads to increased dendritic Limk1 levels and phosphorylation of cofilin1 in DIV 10 neurons.**

- A. Representative intensity profiles (Left and Center) and quantification (Right) of mean fluorescent intensities from the dendrites for Limk1 (Top) and p-cofilin1 (Bottom) from DIV 10 cortical neurons treated with 50ng/ml BDNF for 1 hour (n=21-25 neurons from 2 independent experiments).

Box and whisker plots show median, first and third quartiles with error bars representing the minimum and maximum data points (Mann Whitney test).
